# Supplementary material for: Anomalies in the bulk and surface electronic properties of SnS: effects of native defects
Source: Royal Society of Chemistry journal article supplement (doi:10.1039/d1tc04738h), 2022-01-01
Supplement: d1tc04738h1.pdf [file d1tc04738h1.pdf]

## Supporting Information

### **Anomalies in the bulk and surface electronic properties in SnS: Effect of native defects**

Rohit Dahule<sup>a</sup>, Chetan C. Singh<sup>a</sup>, Kenta Hongo<sup>b,c</sup>, Ryo Maezono<sup>b</sup> and Emila Panda<sup>a,1)</sup>

<sup>a</sup>*Materials Engineering Discipline, Indian Institute of Technology, Gandhinagar, Palaj-382355, Gujarat, India*

<sup>b</sup>*School of Information Science, Japan Advanced Institute of Science and Technology (JAIST), 1-1 Asahidai, Nomi, Ishikawa 923-1292, Japan*

<sup>c</sup>*Research Center for Advanced Computing Infrastructure, JAIST, 1-1 Asahidai, Nomi, Ishikawa 923-1292, Japan*

---

<sup>1)</sup> Electronic mail: [emila@iitgn.ac.in](mailto:emila@iitgn.ac.in).

## S1. SnS supercell

Here, SnS bulk supercell with lattice parameter  $a= 11.41 \text{ \AA}$ ,  $b= 4.026 \text{ \AA}$  and  $c= 4.427 \text{ \AA}$  as shown in Figure S1 was considered for calculation of the electronic structure. Moreover, SnS surface supercell (*i.e.*,  $1\times 1\times 1$ ) was constructed with SnS (111) slab (*i.e.*, bulk SnS slab with (111) surface orientation) and the vacuum on top of it as shown in Figure S2 for the surface study of SnS. Furthermore, a bigger SnS (111) surface supercell (*i.e.*,  $1\times 2\times 1$ ) was constructed for the multi defect to avoid the defect-defect interaction (see Figure S2 (c)).

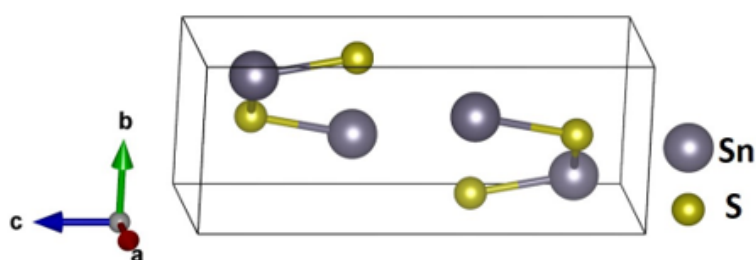

**Figure S1.** Schematic of the bulk SnS supercell showing the atomic positions.

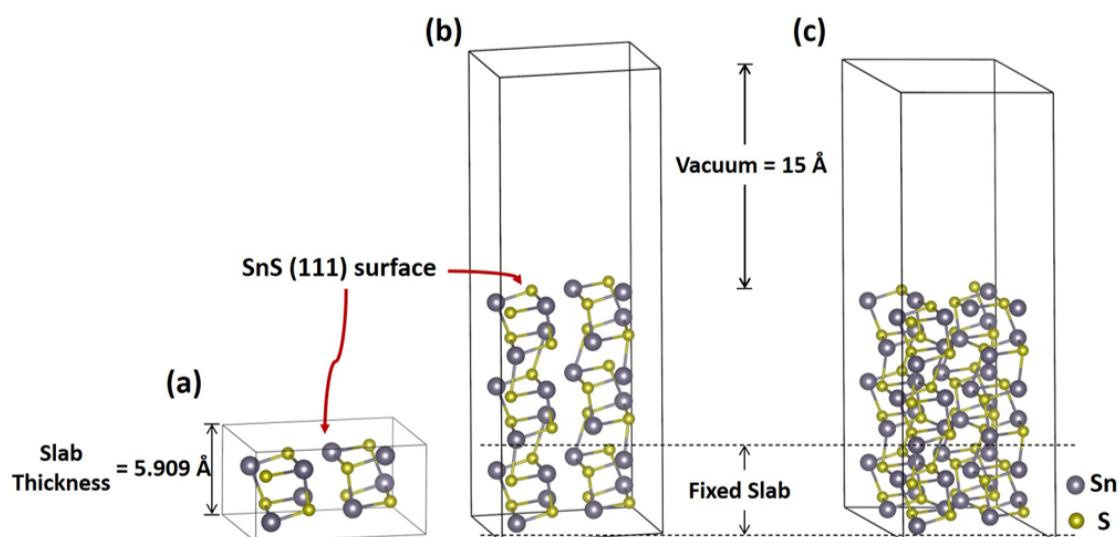

**Figure S2.** Schematic of (a) the bulk SnS (111) slab (b) SnS (111) surface supercell (c) A  $(1\times 2\times 1)$  SnS (111) surface supercell.

## S2. Surface defect site

Here, to obtain the suitable site for  $V_{Sn}$ ,  $V_S$ ,  $Sn_i$ ,  $S_i$ ,  $Sn_S$  and  $S_{Sn}$  defects in SnS (111) surface supercell, formation energy was calculated for different surface configurations. In this regard, the different surface supercell was created by considering the defects on each possible site of the top surface atom. Moreover, the possible defect site for each defect was shown in Figure S3. In addition, the interstitial positions for the  $Sn_i$  and  $S_i$  were selected based upon the centre point between the surrounding atom (*i.e.*, the coordination of P1 was selected as a centre point of the Sn2, Sn3, S1 and S4 atomic site). Next, the formation energy for each possible site was calculated as shown in Table S1. Moreover, the defect site with the least formation energy was selected because this is a more stable surface structure of SnS (111) surface supercell with a defect. Therefore, the defect site of Sn3, S4, P3, P2, S1, Sn3 were selected for  $V_{Sn}$ ,  $V_S$ ,  $Sn_i$ ,  $S_i$ ,  $Sn_S$  and  $S_{Sn}$  defects in SnS (111) surface supercell, respectively.

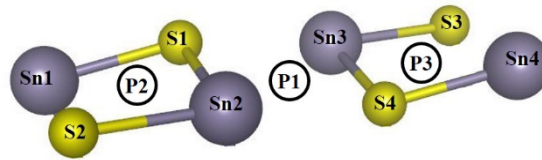

**Figure S3.** Defect sites on the top surface of SnS (111) supercell

**Table S1.** Defect formation energy

| Defect   | Position | Formation Energy |             |
|----------|----------|------------------|-------------|
|          |          | Sn-rich          | S-rich      |
| $V_{Sn}$ | Sn1      | 1.414118         | 0.507184578 |
|          | Sn2      | 1.426418         | 0.519484578 |
|          | Sn3      | 1.412368         | 0.505434578 |
|          | Sn4      | 1.703178         | 0.796244578 |
| $V_S$    | S1       | 0.619553         | 1.526487421 |
|          | S2       | 0.652363         | 1.559297421 |
|          | S3       | 0.641173         | 1.548107421 |
|          | S4       | 0.545613         | 1.452547421 |
| $Sn_i$   | P1       | 1.220812         | 2.127745422 |
|          | P2       | 13.689512        | 14.59644542 |
|          | P3       | 0.884732         | 1.791665422 |
| $S_i$    | P1       | 1.557237         | 0.650302579 |
|          | P2       | 1.427327         | 0.520392579 |
|          | P3       | 1.450647         | 0.543712579 |
| $Sn_S$   | S1       | 0.952005         | 2.765872843 |
|          | S2       | 0.961045         | 2.774912843 |
|          | S3       | 1.102425         | 2.916292843 |
|          | S4       | 1.299475         | 3.113342843 |
| $S_{Sn}$ | Sn1      | 2.237175         | 0.423307157 |
|          | Sn2      | 2.424795         | 0.610927157 |
|          | Sn3      | 2.055125         | 0.241257157 |
|          | Sn4      | 2.541525         | 0.727657157 |

### S3. Surface relaxation

The summary of the ionic displacements of the atoms in the top slabs for the SnS (111) surface supercell and the SnS surface supercell with various defects were reported in Table S2-S11. Note that, the positive displacements along the *c*-direction denoted the relaxations towards the vacuum side. Moreover, the magnitude of these displacements ( $\Delta a$ ,  $\Delta b$  and  $\Delta c$ ) was measured based on the differences between the atomic positions of the initial unrelaxed surface model and that of the relaxed surface model.

**Table S2.** Displacement of the top surface atoms on SnS (111) surface supercell.

| Atom | $\Delta a$ | $\Delta b$ | $\Delta c$ |
|------|------------|------------|------------|
| Sn1  | 0.186074   | 0.401023   | 0.536532   |
| Sn2  | -0.125552  | 0.105623   | 0.149653   |
| Sn3  | 0.054756   | 0.104376   | -0.043838  |
| Sn4  | -0.295991  | -0.14545   | -0.329943  |
| Sn5  | 0.491389   | 0.358348   | 0.745885   |
| Sn6  | 1.03629    | 0.413483   | 0.149544   |
| Sn7  | 0.698894   | -0.137314  | -0.19324   |
| Sn8  | 0.248013   | -0.163412  | 0.196939   |
| S1   | 0.0240848  | 0.252566   | -0.093423  |
| S2   | -0.166825  | 0.182622   | 0.218039   |
| S3   | 0.173419   | 0.0596606  | -0.024471  |
| S4   | -0.046764  | -0.017541  | 0.224098   |
| S5   | 0.943742   | -0.024071  | 0.328458   |
| S6   | 0.167473   | -0.165422  | 0.111134   |
| S7   | 0.944353   | -0.010694  | 0.308461   |
| S8   | 0.269846   | -0.180528  | 0.22128    |

**Table S3.** Displacement of the top surface atoms on SnS (111) surface supercell with  $V_{Sn}$ .

| Atom | $\Delta a$ | $\Delta b$ | $\Delta c$ |
|------|------------|------------|------------|
| Sn1  | 0.0368511  | 0.302927   | 0.674156   |
| Sn2  | -0.405514  | 0.0442624  | 6.08E-02   |
| Sn4  | -0.0681798 | 0.0382604  | -0.442527  |
| Sn5  | 0.486951   | 0.114873   | 0.861625   |
| Sn6  | 1.01147    | 0.0796944  | 0.272774   |
| Sn7  | 0.865924   | -0.220414  | -0.135453  |
| Sn8  | 0.401895   | 0.00660636 | 0.381825   |
| S1   | -0.249264  | 0.141394   | -0.155441  |
| S2   | -0.323439  | 0.0725091  | 0.259799   |
| S3   | -0.390887  | 0.0955486  | -0.0496516 |
| S4   | 0.122781   | 0.431529   | 0.264002   |
| S5   | 1.00806    | 0.0145086  | 0.47716    |
| S6   | 0.142397   | -0.112439  | 0.0156808  |
| S7   | 1.10757    | 0.178667   | 0.333508   |
| S8   | 0.316365   | 0.0537424  | 0.141042   |

**Table S4.** Displacement of the top surface atoms on SnS (111) surface supercell with  $V_S$ .

| Atom | $\Delta a$ | $\Delta b$ | $\Delta c$ |
|------|------------|------------|------------|
| Sn1  | 0.0194238  | 0.379012   | 0.529805   |
| Sn2  | -0.266853  | 0.0959902  | 0.0686376  |
| Sn3  | -0.0590339 | -0.264233  | -0.255198  |
| Sn4  | 0.325474   | -0.131724  | -0.297726  |
| Sn5  | 0.413934   | 0.34359    | 0.736753   |
| Sn6  | 0.886035   | 0.389389   | 0.0989082  |
| Sn7  | 0.571935   | -0.130539  | -0.0484753 |
| Sn8  | 0.183282   | -0.0844914 | 0.452899   |
| S1   | -0.152927  | 0.22913    | -0.13136   |
| S2   | -0.351242  | 0.177294   | 0.22916    |
| S3   | 0.129799   | -0.0142155 | 0.0632616  |
| S5   | 0.786963   | -0.056834  | 0.322459   |
| S6   | 0.0964384  | -0.197975  | 0.0182502  |
| S7   | 0.753441   | -0.0685762 | 0.211393   |
| S8   | 0.251026   | -0.230298  | 0.457926   |

**Table S5.** Displacement of the top surface atoms on SnS (111) surface supercell with Sn<sub>i</sub>.

| Atom            | $\Delta a$ | $\Delta b$ | $\Delta c$ |
|-----------------|------------|------------|------------|
| Sn <sub>i</sub> | 0.250544   | -0.384544  | 1.39408    |
| Sn1             | 0.172037   | 0.354971   | 0.713301   |
| Sn2             | -0.119671  | 0.0102817  | 0.222476   |
| Sn3             | 1.4043     | 0.338035   | -0.210805  |
| Sn4             | -0.853124  | -0.0243497 | 0.0186075  |
| Sn5             | 0.513904   | 0.279421   | 0.819269   |
| Sn6             | 0.918205   | 0.329454   | -0.285457  |
| Sn7             | 0.606386   | -0.146016  | 0.0196792  |
| Sn8             | 0.0642315  | -0.16258   | 0.355658   |
| S1              | 0.186298   | 0.332637   | 0.767603   |
| S2              | -0.130356  | 0.136587   | 0.325583   |
| S3              | -0.0672118 | 0.0402081  | 0.165413   |
| S4              | 0.253006   | 0.045178   | 0.240931   |
| S5              | 0.741084   | -0.174592  | 0.562457   |
| S6              | 0.187191   | -0.457852  | 0.186068   |
| S7              | 0.774083   | -0.0689931 | 0.476235   |
| S8              | 0.181462   | -0.214696  | 0.615165   |

**Table S6.** Displacement of the top surface atoms on SnS (111) surface supercell with S<sub>i</sub>.

| Atom           | $\Delta a$ | $\Delta b$ | $\Delta c$ |
|----------------|------------|------------|------------|
| S <sub>i</sub> | 0.844178   | 1.07646    | 0.947628   |
| Sn1            | -0.0966828 | 0.160098   | 0.507056   |
| Sn2            | -0.653325  | 0.114159   | 0.334612   |
| Sn3            | -0.302327  | 0.192188   | 0.104814   |
| Sn4            | -0.604897  | -0.0888939 | -0.369042  |
| Sn5            | 0.204459   | -0.199112  | 0.412874   |
| Sn6            | 0.833151   | 0.00380155 | 0.114105   |
| Sn7            | 0.59883    | -0.0387785 | -0.234171  |
| Sn8            | 0.151237   | -0.0811003 | 0.285549   |
| S1             | -0.372148  | -0.382201  | -0.226152  |
| S2             | 0.441598   | -0.245522  | -0.364272  |
| S3             | -0.220793  | 0.190261   | -0.0466484 |
| S4             | -0.310784  | 0.0644986  | 0.278483   |
| S5             | 0.751687   | -0.28121   | 0.27265    |
| S6             | 0.108251   | -0.602247  | 0.354525   |
| S7             | 0.886445   | 0.069348   | 0.439274   |
| S8             | 0.181458   | -0.0822316 | 0.150177   |

**Table S7.** Displacement of the top surface atoms on SnS (111) surface supercell with Sn<sub>S</sub>.

| Atom            | $\Delta a$  | $\Delta b$   | $\Delta c$  |
|-----------------|-------------|--------------|-------------|
| Sn <sub>S</sub> | -0.458758   | -0.121395    | 0.618401    |
| Sn1             | 0.135369    | 0.0577321    | 0.57503     |
| Sn2             | -0.0788663  | -0.00490903  | -0.109197   |
| Sn3             | -0.0379768  | 0.377371     | 0.0635762   |
| Sn4             | -0.439693   | 0.0709681    | -0.326768   |
| Sn5             | 0.560552    | 0.136186     | 0.586769    |
| Sn6             | 1.06855     | -0.0463574   | 0.387656    |
| Sn7             | 0.722493    | -0.000945317 | -0.178782   |
| Sn8             | 0.229272    | 0.0390694    | 0.295458    |
| S2              | -0.166073   | -0.1235      | 0.0904835   |
| S3              | -0.00223445 | 0.281518     | -0.00746236 |
| S4              | -0.168345   | 0.257149     | 0.338295    |
| S5              | 0.986883    | -0.251647    | 0.428684    |
| S6              | 0.214917    | -0.324696    | -0.0955159  |
| S7              | 1.06148     | 0.205695     | 0.434858    |
| S8              | 0.22339     | 0.0339096    | 0.224152    |

**Table S8.** Displacement of the top surface atoms on SnS (111) surface supercell with S<sub>Sn</sub>.

| Atom            | $\Delta a$ | $\Delta b$  | $\Delta c$ |
|-----------------|------------|-------------|------------|
| S <sub>Sn</sub> | -0.629782  | -0.386453   | 0.922144   |
| Sn1             | 0.412602   | 0.380373    | 0.493959   |
| Sn2             | 0.144867   | 0.088969    | 0.196778   |
| Sn4             | -0.579033  | -0.285359   | -0.382607  |
| Sn5             | 0.642146   | 0.363561    | 0.657274   |
| Sn6             | 1.17785    | 0.321638    | 0.25863    |
| Sn7             | 0.869223   | -0.00601978 | -0.450263  |
| Sn8             | 0.429611   | 0.195519    | 0.324246   |
| S1              | 0.243723   | 0.209402    | -0.0585952 |
| S2              | 0.118031   | 0.175758    | 0.181901   |
| S3              | 0.126893   | 0.160579    | -0.0368568 |
| S4              | -0.122591  | 0.726387    | 0.442874   |
| S5              | 1.10119    | -0.0517087  | 0.32985    |
| S6              | 0.335493   | -0.175257   | 0.196021   |
| S7              | 1.09318    | 0.211933    | 0.248508   |
| S8              | 0.379844   | -0.0447495  | 0.212098   |



**Table S9.** Displacement of the top surface atoms on SnS (111) surface supercell with  $V_{Sn} + 2 V_S$ .

| <b>Atom</b> | <b><math>\Delta a</math></b> | <b><math>\Delta b</math></b> | <b><math>\Delta c</math></b> |
|-------------|------------------------------|------------------------------|------------------------------|
| Sn1         | 0.02897934                   | 0.292111902                  | 0.281373859                  |
| Sn2         | -0.071254179                 | 0.053831394                  | -0.05963109                  |
| Sn3         | -0.105168218                 | -0.265348406                 | 0.238743157                  |
| Sn4         | -0.175142228                 | -0.011521945                 | 0.058948557                  |
| Sn5         | -0.188270547                 | -0.105476842                 | -0.118685174                 |
| Sn6         | -0.234279623                 | 0.084347113                  | -0.362413239                 |
| Sn7         | 0.074521923                  | 0.080631282                  | -0.173462052                 |
| Sn8         | 0.801339049                  | 0.133820331                  | 0.066511601                  |
| Sn9         | 0.024952237                  | 0.172306562                  | 0.674460408                  |
| Sn10        | 0.817472537                  | 0.236633637                  | -0.002340942                 |
| Sn11        | 0.278889641                  | 0.113429971                  | 0.608290558                  |
| Sn12        | 0.496178173                  | -0.13264771                  | -0.043555267                 |
| Sn13        | 0.10358942                   | -0.289926885                 | 0.367339092                  |
| Sn14        | 0.392638617                  | -0.128162959                 | -0.018996676                 |
| Sn15        | 0.201480656                  | 0.018163671                  | 0.229158656                  |
| S1          | -0.132963064                 | 0.159796181                  | -0.239738396                 |
| S2          | -0.06979036                  | 0.119085048                  | -0.192190555                 |
| S3          | -0.290298935                 | 0.107634059                  | 0.075340959                  |
| S4          | 0.156321946                  | -0.000604731                 | -0.060772516                 |
| S5          | 0.051390785                  | 0.575662878                  | 0.293039842                  |
| S6          | -0.02139751                  | 0.05797735                   | 0.029270487                  |
| S7          | 0.674836346                  | -0.139710796                 | 0.143770428                  |
| S8          | -0.215406113                 | -0.186199211                 | 0.037636111                  |
| S9          | 0.671831765                  | -0.142065051                 | 0.159394133                  |
| S10         | -0.045318065                 | -0.256557792                 | 0.031963829                  |
| S11         | 0.696602032                  | -0.105157229                 | -0.036628286                 |
| S12         | 0.137818578                  | -0.247274939                 | 0.540692714                  |
| S13         | 0.565705432                  | -0.209153146                 | 0.063400994                  |
| S14         | 0.302647851                  | -0.249327803                 | 0.554493428                  |

**Table S10.** Displacement of the top surface atoms on SnS (111) surface supercell with  $V_{\text{Sn}} + 2 \text{Sn}_i$ .

| Atom              | $\Delta a$   | $\Delta b$   | $\Delta c$   |
|-------------------|--------------|--------------|--------------|
| Sn <sub>i</sub> 1 | -0.136343218 | 0.365761977  | -0.034390249 |
| Sn <sub>i</sub> 2 | -0.309332682 | -0.411884798 | 1.206697062  |
| Sn1               | 0.17784362   | 0.296587325  | -0.022986345 |
| Sn2               | -1.192040649 | -0.874760035 | 0.029168833  |
| Sn3               | -10.63965205 | 2.285614575  | -0.420553406 |
| Sn4               | -0.548434966 | 0.000023496  | -0.046378338 |
| Sn5               | -0.694399262 | -0.420307953 | 0.122706791  |
| Sn6               | 0.662887476  | -0.355177083 | -0.426374781 |
| Sn7               | -0.933628644 | 0.846457441  | 0.678751166  |
| Sn8               | 0.467998436  | 0.074608846  | -0.15505884  |
| Sn9               | 0.11574603   | -0.01168153  | 0.559218878  |
| Sn10              | 0.637289394  | 0.085961775  | -0.151777843 |
| Sn11              | 0.120839254  | -0.229679196 | 0.113895827  |
| Sn12              | 0.271910301  | -0.281355233 | -0.185253893 |
| Sn13              | 0.113277962  | -0.371720744 | -0.009782968 |
| Sn14              | 0.061274533  | -0.744985172 | -0.248043028 |
| Sn15              | 0.388973443  | 0.15472361   | 0.035618525  |
| S1                | -0.026807545 | -0.320043239 | 0.266588555  |
| S2                | 0.103557899  | -0.366995358 | -0.14969152  |
| S3                | -0.560387688 | -0.056229884 | -0.079399366 |
| S4                | -0.125821062 | 0.249061036  | 0.728447291  |
| S5                | 0.210779255  | 0.082428951  | -0.215389889 |
| S6                | -0.127638245 | -0.291660043 | -0.056663767 |
| S7                | -1.021633179 | -0.254643074 | -0.288776191 |
| S8                | 0.315002353  | 0.690479033  | 0.051689507  |
| S9                | 0.314254197  | 0.09604938   | 0.035222559  |
| S10               | -0.104116415 | -0.136455067 | 0.076503685  |
| S11               | 0.492856065  | 0.057796634  | 0.212525188  |
| S12               | -0.022570414 | -0.127279568 | -0.144566232 |
| S13               | 0.775756973  | 0.074955862  | -0.316566405 |
| S14               | 0.392837439  | -0.439198563 | 0.471526497  |
| S15               | 0.690532324  | -0.048748656 | 0.195852029  |
| S16               | 0.249684782  | 0.103490736  | 0.25131144   |

**Table S11.** Displacement of the top surface atoms on SnS (111) surface supercell with  $V_{\text{Sn}} + \text{Sn}_\text{S}$ .

| Atom            | $\Delta a$   | $\Delta b$   | $\Delta c$   |
|-----------------|--------------|--------------|--------------|
| Sn <sub>S</sub> | -0.965281168 | 0.000145585  | 0.601217389  |
| Sn1             | 0.040473763  | 0.173750598  | 0.351085133  |
| Sn2             | -0.191314189 | -0.081789325 | -0.149403017 |
| Sn3             | -0.346819394 | 0.13567432   | 0.385883651  |
| Sn4             | -0.299958204 | 0.290050475  | -0.072712482 |
| Sn5             | -0.149071634 | -0.443382194 | -0.138634491 |
| Sn6             | -0.041686131 | -0.118650662 | -0.258970328 |
| Sn7             | -0.064802567 | 0.066334554  | -0.154616405 |
| Sn8             | 0.764367298  | 0.0829722    | -0.002054375 |
| Sn9             | 0.329940824  | -0.104426627 | 0.44380018   |
| Sn10            | 0.833346541  | 0.048359696  | 0.074094006  |
| Sn11            | 0.276875312  | 0.09046234   | 0.553358778  |
| Sn12            | 0.635055204  | -0.07704286  | -0.083509084 |
| Sn13            | 0.13168639   | -0.345665887 | 0.284365385  |
| Sn14            | 0.645665689  | -0.024264798 | 0.0646828    |
| Sn15            | 0.202553071  | -0.044696547 | 0.269584921  |
| S1              | -0.209814192 | 0.019953195  | -0.161242296 |
| S2              | -0.274792156 | -0.059781728 | -0.083954425 |
| S3              | -0.382693219 | -0.019098308 | 0.001029124  |
| S4              | 0.201335546  | 0.227332013  | -0.057784863 |
| S5              | 0.152766757  | 0.312790258  | 0.215752939  |
| S6              | 0.322920384  | 0.14018838   | 0.134426992  |
| S7              | 0.157858413  | 0.095497554  | 0.168770487  |
| S8              | 0.704765046  | -0.160446889 | 0.213352941  |
| S9              | 0.018963936  | -0.223885637 | -0.110452183 |
| S10             | 0.72172537   | -0.120130669 | 0.308437005  |
| S11             | -0.080788507 | -0.187593246 | -0.034639744 |
| S12             | 0.81718175   | 0.071529873  | -0.07898791  |
| S13             | 0.191047741  | -0.144603988 | 0.45905406   |
| S14             | 0.779810212  | -0.008288481 | 0.224941475  |
| S15             | 0.191657368  | -0.078555538 | 0.459925378  |
